# Supplementary material for: Rapid Relapse of Symptomatic Omicron SARS-CoV-2 Infection Following Early Suppression with Nirmatrelvir/Ritonavir
Source: Research Square preprint supplement (doi:10.21203/rs.3.rs-1588371/v3), 2022-05-23

Table

Time course of SARS-CoV-2 infection and COVID-19 symptoms. Day 0 was the first day of positive tests or symptoms. Shown are the time periods for administration of NM/R (Pax), symptoms (Sx), antigen tests (Ag), PCR (Ct values when available), subvariant classification (Seq), and transmission (Tr). Symptoms and test results are color coded as follows: green, asymptomatic or negative test; red, symptomatic or abnormal test (positive antigen test or PCR Ct <30); pink, mild or improving symptoms, faint antigen test, or PCR Ct >30; yellow, the first possible day of transmission during rebound. * Cue test in 55M.


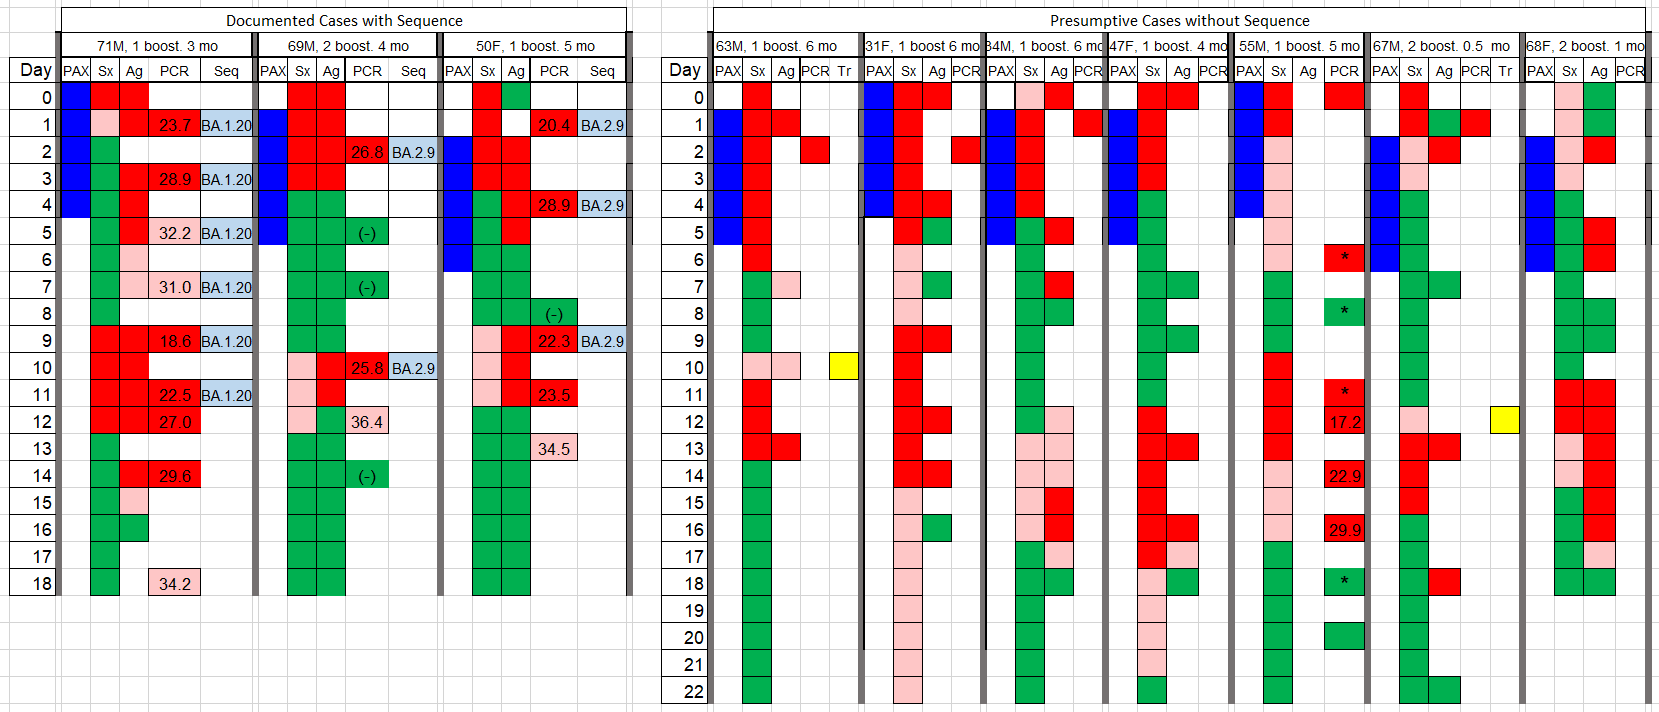

Supplement: Supplementary file 1 [file 2b175f07af693c60e6a2eb61.docx]
